# Supplementary material for: Relationship between interlayer anions and photoluminescence of layered rare earth hydroxides
Source: Royal Society of Chemistry journal article supplement (doi:10.1039/c5tc01339a), 2015-01-01
Supplement: c5tc01339a1.pdf [file c5tc01339a1.pdf]

## Electronic Supplementary Information

### Relationship between interlayer anions and photoluminescence of layered rare earth hydroxides

Hyunsub Kim, Byung-Il Lee, Heejin Jeong, and Song-Ho Byeon

*Department of Applied Chemistry, College of Applied Science and Institute of Natural Sciences, Kyung Hee University, Gyeonggi, 446-701, Korea*

*E-mail: shbyun@khu.ac.kr*

*J. Mater. Chem. C*

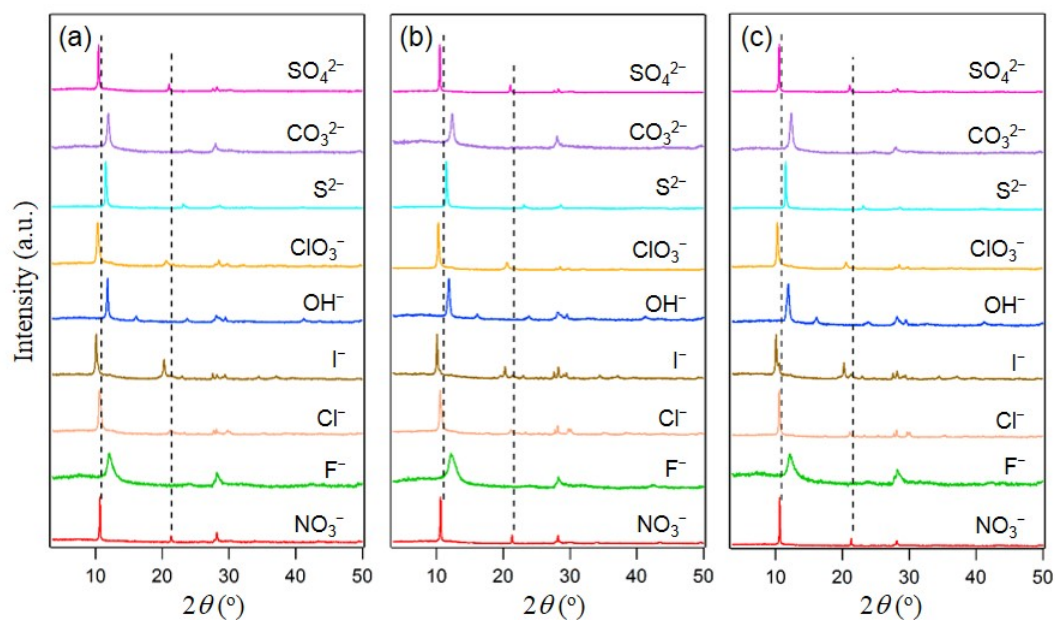

**Fig. S1** Powder X-ray diffraction patterns of  $\text{Gd}_{1.80}\text{RE}_{0.20}(\text{OH})_5\text{X}\cdot n\text{H}_2\text{O}$  (LGdH:RE) where RE = (a) Eu, (b) Tb, and (c) Ce and X =  $\text{NO}_3^-$ ,  $\text{F}^-$ ,  $\text{Cl}^-$ ,  $\text{I}^-$ ,  $\text{OH}^-$ ,  $\text{ClO}_3^-$ ,  $\text{S}^{2-}$ ,  $\text{CO}_3^{2-}$ , and  $\text{SO}_4^{2-}$ . Dotted lines indicate the Bragg angle of (002) and (004) diffractions of corresponding X =  $\text{NO}_3^-$  members.

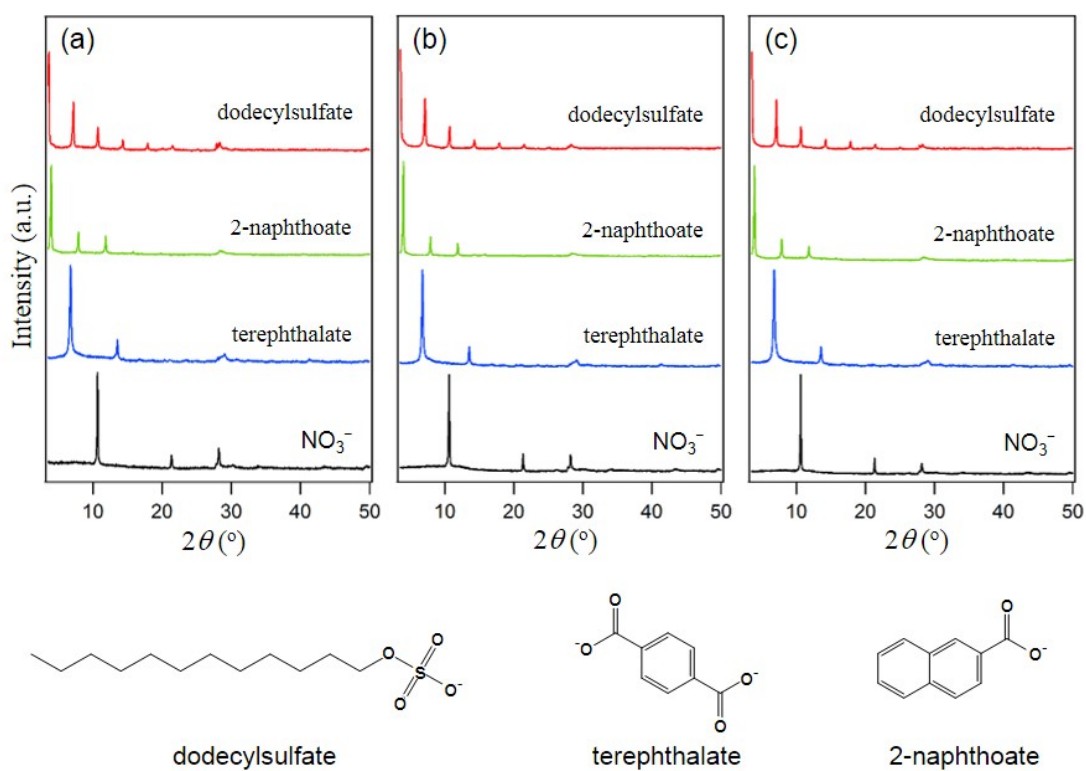

**Fig. S2** Powder X-ray diffraction patterns of  $\text{Gd}_{1.80}\text{RE}_{0.20}(\text{OH})_5\text{X}\cdot n\text{H}_2\text{O}$  (LGdH:RE) where RE = (a) Eu, (b) Tb, and (c) Ce and X =  $\text{NO}_3^-$ , terephthalate, 2-naphthoate, and dodecylsulfate.

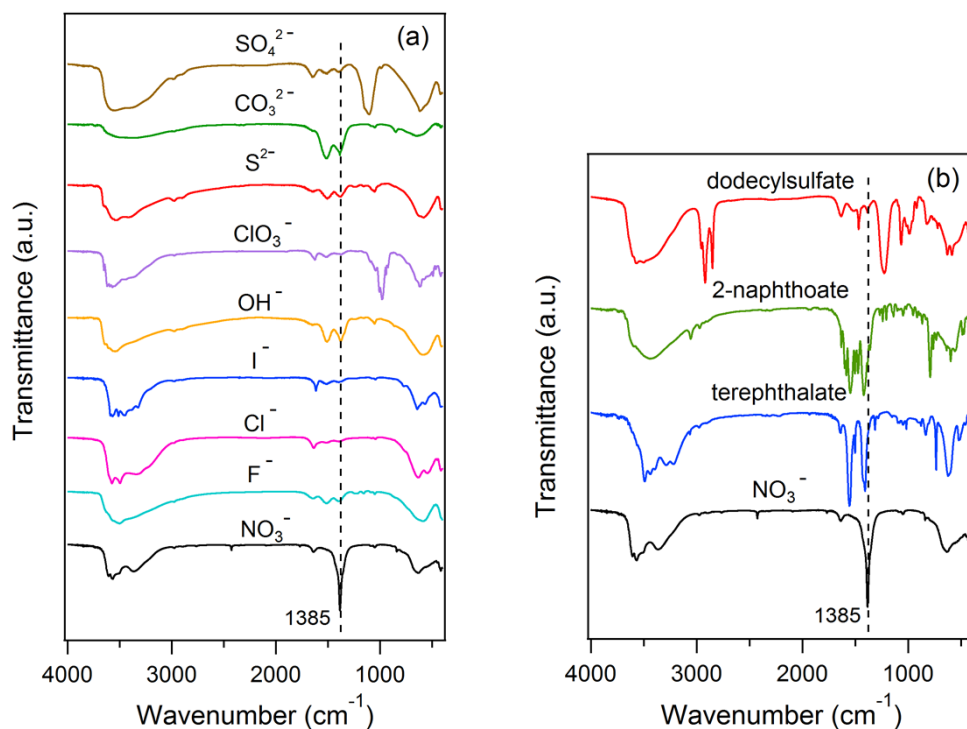

**Fig. S3** FT-IR spectra of  $\text{Gd}_{1.80}\text{Eu}_{0.20}(\text{OH})_5\text{NO}_3 \cdot n\text{H}_2\text{O}$  (LGdH:Eu) and its products obtained after exchange reaction between  $\text{NO}_3^-$  and (a)  $\text{F}^-$ ,  $\text{Cl}^-$ ,  $\text{I}^-$ ,  $\text{OH}^-$ ,  $\text{ClO}_3^-$ ,  $\text{S}^{2-}$ ,  $\text{CO}_3^{2-}$ , and  $\text{SO}_4^{2-}$ , and (b) terephthalate, 2-naphthoate, and dodecylsulfate. The disappearance or significant weakening of the band at  $\sim 1385 \text{ cm}^{-1}$ , which is characteristic of  $\text{NO}_3^-$ , confirmed the essentially complete exchange reaction.

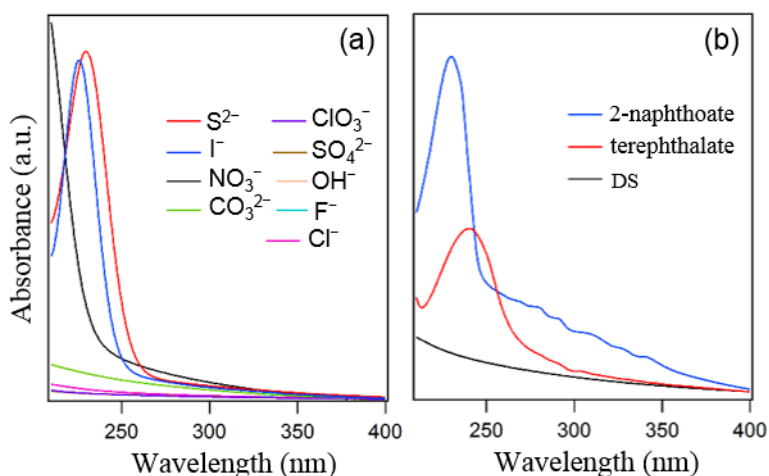

**Fig. S4** UV-VIS absorption spectra of aqueous suspensions containing LGdH hosts (*i.e.* without any activator ion) with (a)  $\text{NO}_3^-$ ,  $\text{F}^-$ ,  $\text{Cl}^-$ ,  $\text{I}^-$ ,  $\text{OH}^-$ ,  $\text{ClO}_3^-$ ,  $\text{S}^{2-}$ ,  $\text{CO}_3^{2-}$ , and  $\text{SO}_4^{2-}$  anions and (b) dodecylsulfate (DS), terephthalate, and 2-naphthoate anions in the interlayer space.

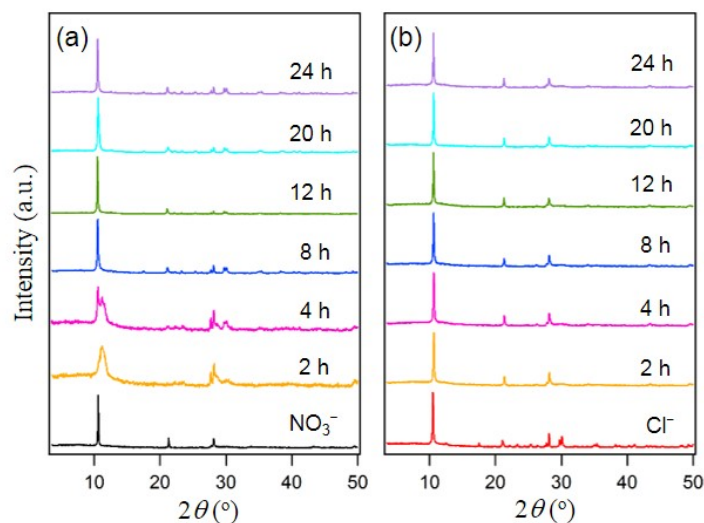

**Fig. S5** XRD patterns measured as a function of reaction time during the exchange reaction of  $\text{Gd}_{1.80}\text{Ce}_{0.20}(\text{OH})_5\text{NO}_3 \cdot n\text{H}_2\text{O}$  with  $\text{Cl}^-$  (a) and inversely  $\text{Gd}_{1.80}\text{Ce}_{0.20}(\text{OH})_5\text{Cl} \cdot n\text{H}_2\text{O}$  with  $\text{NO}_3^-$  (b). The transformation from  $\text{Gd}_{1.80}\text{Ce}_{0.20}(\text{OH})_5\text{NO}_3 \cdot n\text{H}_2\text{O}$  to  $\text{Gd}_{1.80}\text{Ce}_{0.20}(\text{OH})_5\text{Cl} \cdot n\text{H}_2\text{O}$  requires the exchange reaction for at least 8 h whereas the inverse transformation from  $\text{Gd}_{1.80}\text{Ce}_{0.20}(\text{OH})_5\text{Cl} \cdot n\text{H}_2\text{O}$  to  $\text{Gd}_{1.80}\text{Ce}_{0.20}(\text{OH})_5\text{NO}_3 \cdot n\text{H}_2\text{O}$  is complete even after 2 h reaction at room temperature.
